# Supplementary material
Source: MDPI journal article supplement (https://www.mdpi.com/1911-8074/14/6/265)
Supplement: s1 [file s1]

Archive with 1 entries (1 files):
- jrfm-1246258-supplementary.pdf
